# Supplementary material for: Altered ribosomal function and protein synthesis caused by tau
Source: Springer Nature journal article supplement (doi:10.1186/s40478-021-01208-4), 2021-06-19

# Supplementary Figure 2

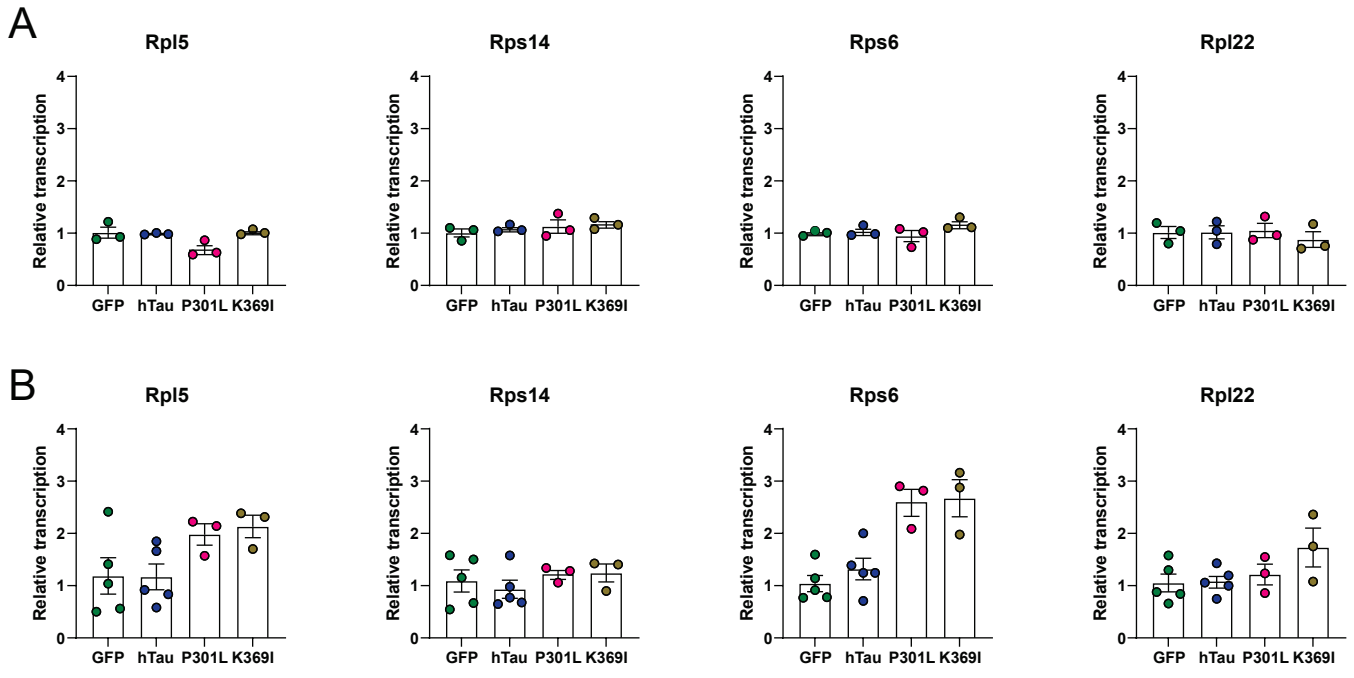

Supplement: MOESM2 [file 25667732]
