# Supplementary material for: Altered ribosomal function and protein synthesis caused by tau
Source: Acta Neuropathol Commun. 2021 Jun 19;9:110. doi: 10.1186/s40478-021-01208-4 (PMC8214309; doi:10.1186/s40478-021-01208-4)
Supplement: Supplementary file 4 — Additional File 4: List of ribosomal protein abundance in K3 primary neurons. List of ribosomal proteins quantified in primary cortical neurons cultured from K369I mice, with their fold-change relative to WT controls. Neurons from individual pups were cultured until DIV18 before label-free quantitative mass spectrometry was used to analyse the abundance of 80 ribosomal proteins. Data includes UniProt accession number, description of the RP, the number of unique peptides used in quantification, the fold-change compared to WT average for each animal, the fold-change in K3 pups vs WT control and the p-value result of an unpaired t-test comparison. Significantly altered proteins are coloured and shown with bold text. [file 40478_2021_1208_MOESM4_ESM.xlsx]

## Sheet: Sheet1
Accession	Description	# Unique Peptides	WT-1	WT-2	WT-3	WT-4	Tg-1	Tg-2	Tg-3	Tg-4	FC	p-value
P62858	40S ribosomal protein S28 OS=Mus musculus OX=10090 GN=Rps28 PE=1 SV=1	5	1.07326	0.95851	0.959332	1.0089	0.663289	0.590716	0.58387	0.734767	0.64316	0.000203668
P25444	40S ribosomal protein S2 OS=Mus musculus OX=10090 GN=Rps2 PE=1 SV=3	9	1.15026	0.924596	0.899644	1.0255	0.607074	0.739238	0.502056	0.732109	0.645119	0.00446657
P62751	60S ribosomal protein L23a OS=Mus musculus OX=10090 GN=Rpl23a PE=1 SV=1	7	0.926736	0.916621	1.0339	1.12274	0.710224	0.773373	0.427829	0.649809	0.640309	0.00700804
O09167	60S ribosomal protein L21 OS=Mus musculus OX=10090 GN=Rpl21 PE=1 SV=3	5	1.10513	1.0467	0.899865	0.948299	1.19892	1.38881	1.45378	1.18355	1.30627	0.00978637
P14115	60S ribosomal protein L27a OS=Mus musculus OX=10090 GN=Rpl27a PE=1 SV=5	2	0.98374	0.960511	0.88676	1.16899	0.759582	0.837398	0.604239	0.767712	0.742233	0.0159663
Q6ZWV7	60S ribosomal protein L35 OS=Mus musculus OX=10090 GN=Rpl35 PE=1 SV=1	4	0.767243	1.25535	1.00843	0.968978	0.657138	0.348043	0.313838	0.77723	0.524062	0.0203156
P47964	60S ribosomal protein L36 OS=Mus musculus OX=10090 GN=Rpl36 PE=1 SV=2	1	0.866944	0.893474	1.13708	1.10251	0.798874	0.656572	0.43977	0.724776	0.654998	0.0161732
P62754	40S ribosomal protein S6 OS=Mus musculus OX=10090 GN=Rps6 PE=1 SV=1	10	1.11104	1.20409	0.970167	0.714701	1.96747	1.38761	1.75897	1.2252	1.58481	0.0266204
P62264	40S ribosomal protein S14 OS=Mus musculus OX=10090 GN=Rps14 PE=1 SV=3	9	0.726912	1.04681	1.0235	1.20278	0.62231	0.829394	0.324661	0.579676	0.58901	0.028692
P62274	40S ribosomal protein S29 OS=Mus musculus OX=10090 GN=Rps29 PE=1 SV=2	3	1.06116	0.961351	0.921368	1.05612	0.805864	0.922849	0.576929	0.802014	0.776914	0.0320362
Q9DB15	39S ribosomal protein L12, mitochondrial OS=Mus musculus OX=10090 GN=Mrpl12 PE=1 SV=2	4	1.07068	0.970062	1.05755	0.901709	0.889405	0.564046	0.328093	0.780041	0.640396	0.0328612
P97461	40S ribosomal protein S5 OS=Mus musculus OX=10090 GN=Rps5 PE=1 SV=3	9	0.870015	1.00993	0.932139	1.18791	0.767315	0.753323	0.391213	0.749126	0.665244	0.0264714
P47962	60S ribosomal protein L5 OS=Mus musculus OX=10090 GN=Rpl5 PE=1 SV=3	10	1.03169	0.957817	1.08122	0.929276	0.728367	0.724729	0.46198	0.745156	0.665058	0.00457926
P62717	60S ribosomal protein L18a OS=Mus musculus OX=10090 GN=Rpl18a PE=1 SV=1	4	1.01842	0.936909	0.914502	1.13017	0.646733	0.866886	0.360199	0.792101	0.66648	0.0340527
P97351	40S ribosomal protein S3a OS=Mus musculus OX=10090 GN=Rps3a PE=1 SV=3	13	0.97202	0.947345	0.949108	1.13153	0.803995	0.917383	0.50437	0.823676	0.762356	0.0546846
P62862	40S ribosomal protein S30 OS=Mus musculus OX=10090 GN=Fau PE=1 SV=1	2	0.839481	1.18733	1.06211	0.911081	0.74817	0.922096	0.53859	0.74817	0.739256	0.0562827
Q9CQR2	40S ribosomal protein S21 OS=Mus musculus OX=10090 GN=Rps21 PE=1 SV=1	5	1.09023	0.88895	0.79796	1.22286	0.903012	0.643827	0.358999	0.711932	0.654443	0.0584668
P62852	40S ribosomal protein S25 OS=Mus musculus OX=10090 GN=Rps25 PE=1 SV=1	5	0.882767	0.883646	0.976553	1.25703	0.827081	0.863716	0.5932	0.749707	0.758426	0.0645224
P14869	60S acidic ribosomal protein P0 OS=Mus musculus OX=10090 GN=Rplp0 PE=1 SV=3	13	1.01138	1.01637	0.937082	1.03517	0.735629	0.959107	0.48249	0.871302	0.762132	0.0662666
Q9JIK9	28S ribosomal protein S34, mitochondrial OS=Mus musculus OX=10090 GN=Mrps34 PE=1 SV=1	3	0.967069	1.06938	0.813733	1.14981	0.663133	0.916732	0.427316	0.829463	0.709161	0.0662736
Q9CR57	60S ribosomal protein L14 OS=Mus musculus OX=10090 GN=Rpl14 PE=1 SV=3	6	0.900845	0.971691	1.05588	1.07159	0.766859	0.990366	0.53357	0.823181	0.778494	0.0738093
P63323	40S ribosomal protein S12 OS=Mus musculus OX=10090 GN=Rps12 PE=1 SV=2	9	0.947843	0.968764	0.902223	1.18117	0.689525	0.933605	0.472468	0.878105	0.743426	0.0788986
P62082	40S ribosomal protein S7 OS=Mus musculus OX=10090 GN=Rps7 PE=2 SV=1	8	0.942117	0.875883	0.786239	1.39576	0.817929	0.671472	0.669188	0.692884	0.712868	0.0866154
P62843	40S ribosomal protein S15 OS=Mus musculus OX=10090 GN=Rps15 PE=1 SV=2	4	0.924231	1.03605	0.935413	1.10431	0.974548	0.647639	0.485214	0.955127	0.765632	0.115011
P62908	40S ribosomal protein S3 OS=Mus musculus OX=10090 GN=Rps3 PE=1 SV=1	20	0.974627	0.984478	0.910149	1.13075	0.827761	1.02179	0.502388	0.812239	0.791045	0.124488
P61255	60S ribosomal protein L26 OS=Mus musculus OX=10090 GN=Rpl26 PE=1 SV=1	7	0.799886	0.980414	0.942946	1.27675	0.628726	0.904059	0.351689	0.928186	0.703165	0.128438
Q8BP67	60S ribosomal protein L24 OS=Mus musculus OX=10090 GN=Rpl24 PE=1 SV=2	4	0.976993	0.921387	0.801557	1.30006	0.739	0.937791	0.268159	0.817405	0.690589	0.138628
P35980	60S ribosomal protein L18 OS=Mus musculus OX=10090 GN=Rpl18 PE=1 SV=3	6	0.959354	0.952182	0.813808	1.27466	0.8159	0.889719	0.572923	0.894501	0.793261	0.144816
P47963	60S ribosomal protein L13 OS=Mus musculus OX=10090 GN=Rpl13 PE=1 SV=3	8	0.792809	1.00854	1.00285	1.19581	0.912959	0.946517	0.554607	0.776929	0.797753	0.146249
P41105	60S ribosomal protein L28 OS=Mus musculus OX=10090 GN=Rpl28 PE=1 SV=2	2	0.974488	1.07337	0.710025	1.24211	0.897736	0.871865	0.362487	0.766942	0.724757	0.149729
Q9CXW4	60S ribosomal protein L11 OS=Mus musculus OX=10090 GN=Rpl11 PE=1 SV=4	5	0.872169	1.04875	0.993781	1.0853	1.00699	0.836545	0.613589	0.912706	0.842457	0.151674
Q6ZWN5	40S ribosomal protein S9 OS=Mus musculus OX=10090 GN=Rps9 PE=1 SV=3	12	1.02559	0.954126	0.908403	1.11188	0.912945	0.990765	0.518698	0.844512	0.81673	0.155483
P84099	60S ribosomal protein L19 OS=Mus musculus OX=10090 GN=Rpl19 PE=1 SV=1	5	0.946463	0.947885	0.717241	1.38841	0.685958	0.726911	0.415499	0.997085	0.706363	0.161671
P62900	60S ribosomal protein L31 OS=Mus musculus OX=10090 GN=Rpl31 PE=1 SV=1	5	0.732205	0.979288	1.236	1.05251	0.859685	0.94895	0.397025	0.795216	0.750219	0.170483
P62830	60S ribosomal protein L23 OS=Mus musculus OX=10090 GN=Rpl23 PE=1 SV=1	6	1.11787	1.14586	0.715504	1.02077	1.00503	0.830964	0.372913	0.788687	0.749399	0.182523
P62918	60S ribosomal protein L8 OS=Mus musculus OX=10090 GN=Rpl8 PE=1 SV=2	10	0.951682	1.02335	0.83419	1.19078	0.989279	0.961081	0.388897	0.709943	0.7623	0.183425
Q6ZWV3	60S ribosomal protein L10 OS=Mus musculus OX=10090 GN=Rpl10 PE=1 SV=3	6	1.02141	0.976301	0.822373	1.17991	0.877543	0.89004	0.572735	0.975082	0.82885	0.186454
P62301	40S ribosomal protein S13 OS=Mus musculus OX=10090 GN=Rps13 PE=1 SV=2	10	1.08793	0.953742	0.803911	1.15442	1.01482	0.851448	0.497631	0.857164	0.805265	0.196441
O55142	60S ribosomal protein L35a OS=Mus musculus OX=10090 GN=Rpl35a PE=1 SV=2	5	0.75627	0.791997	1.41279	1.03894	0.868024	0.982351	0.411861	0.597356	0.714898	0.201926
Q9D1R9	60S ribosomal protein L34 OS=Mus musculus OX=10090 GN=Rpl34 PE=1 SV=2	2	0.86328	0.916062	1.10666	1.11399	1.03805	0.924859	0.330181	0.745107	0.759548	0.20282
P99027	60S acidic ribosomal protein P2 OS=Mus musculus OX=10090 GN=Rplp2 PE=1 SV=3	9	1.02996	0.929949	0.833295	1.2068	0.989405	0.903423	0.577178	0.847321	0.829332	0.203175
P62983	Ubiquitin-40S ribosomal protein S27a OS=Mus musculus OX=10090 GN=Rps27a PE=1 SV=2	1	0.969036	1.08712	0.973528	0.970319	0.923151	1.02647	0.807958	0.943687	0.925317	0.212956
P62270	40S ribosomal protein S18 OS=Mus musculus OX=10090 GN=Rps18 PE=1 SV=3	13	0.992311	1.02151	0.925204	1.06097	1.07029	0.894757	0.616699	0.874874	0.864155	0.213902
Q9CPR4	60S ribosomal protein L17 OS=Mus musculus OX=10090 GN=Rpl17 PE=1 SV=3	7	1.03674	1.02506	0.684345	1.25385	0.772299	0.973921	0.37227	0.894441	0.753233	0.214958
P27659	60S ribosomal protein L3 OS=Mus musculus OX=10090 GN=Rpl3 PE=1 SV=3	13	0.969098	1.09001	0.820651	1.12024	0.954134	1.04661	0.418107	0.764085	0.795735	0.234929
P53026	60S ribosomal protein L10a OS=Mus musculus OX=10090 GN=Rpl10a PE=1 SV=3	9	1.07558	0.921792	0.869189	1.13344	0.925505	1.03783	0.599366	0.863928	0.856657	0.2479
P61358	60S ribosomal protein L27 OS=Mus musculus OX=10090 GN=Rpl27 PE=1 SV=2	6	1.1184	1.12756	0.770522	0.983522	0.892585	1.07995	0.5444	0.807141	0.831019	0.269619
P47911	60S ribosomal protein L6 OS=Mus musculus OX=10090 GN=Rpl6 PE=1 SV=3	10	0.779953	0.998814	0.885231	1.336	0.838671	1.04508	0.395611	0.838078	0.779359	0.271954
P12970	60S ribosomal protein L7a OS=Mus musculus OX=10090 GN=Rpl7a PE=1 SV=2	17	0.948925	1.04559	0.850739	1.15475	0.923616	1.01387	0.452203	0.92819	0.829471	0.278493
P62242	40S ribosomal protein S8 OS=Mus musculus OX=10090 GN=Rps8 PE=1 SV=2	12	1.02769	0.9569	0.900755	1.11465	0.983141	1.04844	0.448852	0.84339	0.830956	0.27907
P62245	40S ribosomal protein S15a OS=Mus musculus OX=10090 GN=Rps15a PE=1 SV=2	9	0.96555	1.02929	0.98586	1.0193	1.00523	1.08804	0.584017	0.822748	0.87501	0.309798
Q9D7S7	60S ribosomal protein L22-like 1 OS=Mus musculus OX=10090 GN=Rpl22l1 PE=1 SV=1	2	1.12697	0.801127	1.19517	0.876733	0.788377	0.941961	0.446965	1.08695	0.816063	0.313267
P62702	40S ribosomal protein S4, X isoform OS=Mus musculus OX=10090 GN=Rps4x PE=1 SV=2	21	0.970539	0.988246	0.779423	1.26179	0.972065	0.986109	0.43749	0.931461	0.831781	0.347565
Q8K2M0	39S ribosomal protein L38, mitochondrial OS=Mus musculus OX=10090 GN=Mrpl38 PE=1 SV=2	1	1.07269	0.975392	1.26052	0.691397	0.983868	0.701455	0.66484	1.04252	0.848171	0.358875
P60867	40S ribosomal protein S20 OS=Mus musculus OX=10090 GN=Rps20 PE=1 SV=1	5	1.071	1.02812	0.804412	1.09647	1.11978	0.916265	0.525089	0.895137	0.864067	0.371125
P63325	40S ribosomal protein S10 OS=Mus musculus OX=10090 GN=Rps10 PE=1 SV=1	8	1.17927	0.890979	0.820272	1.10948	1.13618	0.945604	0.362947	0.838783	0.820879	0.371735
P19253	60S ribosomal protein L13a OS=Mus musculus OX=10090 GN=Rpl13a PE=1 SV=4	6	1.03302	0.836111	0.853704	1.27716	0.955556	1.05895	0.528704	0.864198	0.851852	0.373043
P63276	40S ribosomal protein S17 OS=Mus musculus OX=10090 GN=Rps17 PE=1 SV=2	5	1.13983	0.963526	0.644091	1.25255	0.932811	0.966598	0.535668	0.936804	0.84297	0.385519
Q9CQE3	28S ribosomal protein S17, mitochondrial OS=Mus musculus OX=10090 GN=Mrps17 PE=1 SV=1	1	1.07921	0.993596	1.1111	0.816097	0.978061	1.00483	1.20811	1.11226	1.07582	0.404721
P35979	60S ribosomal protein L12 OS=Mus musculus OX=10090 GN=Rpl12 PE=1 SV=2	8	0.883055	0.975409	0.927651	1.21388	1.08832	0.989326	0.671464	0.841306	0.897604	0.415252
Q9JJI8	60S ribosomal protein L38 OS=Mus musculus OX=10090 GN=Rpl38 PE=1 SV=3	3	1.04289	1.14995	0.564949	1.24221	1.04566	0.814563	0.613082	0.931811	0.85128	0.43221
P62855	40S ribosomal protein S26 OS=Mus musculus OX=10090 GN=Rps26 PE=1 SV=3	3	1.18534	0.831776	0.883586	1.0993	0.988147	1.05126	0.55232	0.943873	0.8839	0.441686
P83882	60S ribosomal protein L36a OS=Mus musculus OX=10090 GN=Rpl36a PE=3 SV=2	2	0.731623	0.941209	1.21736	1.10981	1.04298	0.865296	0.524376	1.03858	0.867806	0.444054
P62849	40S ribosomal protein S24 OS=Mus musculus OX=10090 GN=Rps24 PE=1 SV=1	4	0.990641	0.891231	0.812584	1.30554	1.0998	0.825482	0.682029	0.943138	0.887613	0.45221
Q9D8E6	60S ribosomal protein L4 OS=Mus musculus OX=10090 GN=Rpl4 PE=1 SV=3	16	1.00496	1.03099	0.710257	1.2538	1.09606	1.0251	0.484661	0.831732	0.85939	0.456111
P62281	40S ribosomal protein S11 OS=Mus musculus OX=10090 GN=Rps11 PE=1 SV=3	10	0.961144	0.945912	0.928194	1.16475	0.822816	1.26267	0.470314	0.903637	0.864859	0.461277
Q9CZM2	60S ribosomal protein L15 OS=Mus musculus OX=10090 GN=Rpl15 PE=1 SV=4	7	0.660475	1.15012	1.33283	0.856577	0.745737	1.21955	0.430268	0.912302	0.826964	0.466463
Q9D8P4	39S ribosomal protein L17, mitochondrial OS=Mus musculus OX=10090 GN=Mrpl17 PE=1 SV=1	2	1.04087	1.1381	0.774673	1.04636	0.931352	0.90357	0.94492	0.973671	0.938378	0.468744
Q99N94	39S ribosomal protein L9, mitochondrial OS=Mus musculus OX=10090 GN=Mrpl9 PE=1 SV=2	2	0.760367	1.2146	0.644328	1.3807	0.807659	0.97099	0.86787	3.01886	1.41634	0.488003
P14206	40S ribosomal protein SA OS=Mus musculus OX=10090 GN=Rpsa PE=1 SV=4	16	1.00094	1.03743	0.874803	1.08682	1.18245	0.946209	0.462724	0.958163	0.887386	0.503391
P14131	40S ribosomal protein S16 OS=Mus musculus OX=10090 GN=Rps16 PE=1 SV=4	10	1.02342	1.04716	0.927494	1.00192	1.14084	1.02984	0.6641	0.864613	0.924848	0.508681
Q9CPR5	39S ribosomal protein L15, mitochondrial OS=Mus musculus OX=10090 GN=Mrpl15 PE=1 SV=1	2	1.29041	0.910451	0.762639	1.0365	1.15227	0.845764	0.21401	1.11418	0.831557	0.515754
P62889	60S ribosomal protein L30 OS=Mus musculus OX=10090 GN=Rpl30 PE=1 SV=2	5	1.3246	0.777892	0.704619	1.19289	0.947177	0.987919	0.716936	0.927912	0.894986	0.545949
P14148	60S ribosomal protein L7 OS=Mus musculus OX=10090 GN=Rpl7 PE=1 SV=2	17	1.0747	0.813881	0.613757	1.49767	0.934641	1.09026	0.497666	0.946467	0.867258	0.584666
P51410	60S ribosomal protein L9 OS=Mus musculus OX=10090 GN=Rpl9 PE=2 SV=2	7	1.09363	1.09076	0.633995	1.18161	1.21093	0.946051	0.544745	0.948601	0.912583	0.653242
Q9CQX8	28S ribosomal protein S36, mitochondrial OS=Mus musculus OX=10090 GN=Mrps36 PE=1 SV=1	3	1.36862	0.989303	0.565913	1.07617	1.2396	0.951017	0.711976	0.818145	0.930186	0.740647
Q9CZX8	40S ribosomal protein S19 OS=Mus musculus OX=10090 GN=Rps19 PE=1 SV=3	10	1.0554	0.970593	0.778554	1.19545	1.18993	1.0489	0.620309	0.938749	0.949472	0.746501
P62267	40S ribosomal protein S23 OS=Mus musculus OX=10090 GN=Rps23 PE=1 SV=3	3	0.970927	1.05376	0.879324	1.09599	0.862108	1.41855	0.721455	0.793893	0.949001	0.769294
Q6ZWU9	40S ribosomal protein S27 OS=Mus musculus OX=10090 GN=Rps27 PE=1 SV=3	5	0.910723	1.00277	0.92378	1.16272	1.32985	0.910723	0.759915	0.833361	0.958463	0.77686
P67984	60S ribosomal protein L22 OS=Mus musculus OX=10090 GN=Rpl22 PE=1 SV=2	4	1.13724	0.92539	0.891019	1.04635	1.24531	1.27043	0.618359	0.798149	0.983062	0.924969
